# Supplementary material for: Placental telomere length shortening is not associated with severe preeclampsia but the gestational age
Source: publisher site journal article supplement (doi:10.18632/aging.204445), 2022-12-27
Supplement: Supplementary file [file aging-v15i2-204445-supplementary-material-SD2.pdf]

## SUPPLEMENTARY TABLES

Supplementary Table 1. Logistic regression of all other clinical variables on PE.

| Variable name                      | Coefficient | Standard error | P-value | Significance |
|------------------------------------|-------------|----------------|---------|--------------|
| (Intercept)                        | 71.78       | 13.74          | 0.00    | ***          |
| Mothers' Age                       | 0.03        | 0.05           | 0.51    |              |
| Gestational Age at Delivery (Week) | -1.85       | 0.34           | 0.00    | ***          |
| Membrane Ruptured                  | -0.28       | 0.59           | 0.63    |              |
| Vaginal Bleeding                   | -0.93       | 0.74           | 0.21    |              |
| Weight Gain(lbs)                   | 0.05        | 0.02           | 0.00    | **           |
| Mothers' Height                    | -0.62       | 0.73           | 0.40    |              |
| Pre-pregnancy BMI                  | 0.05        | 0.05           | 0.30    |              |
| Chronic Hypertension               | -0.06       | 0.99           | 0.95    |              |
| History of Asthma                  | 0.20        | 0.76           | 0.79    |              |
| History of Anemia                  | 0.65        | 0.79           | 0.41    |              |
| Baby Sex                           | 0.21        | 0.59           | 0.72    |              |
| Blood Type O                       | -2.11       | 1.14           | 0.06    | .            |
| Blood Type A                       | -2.31       | 1.14           | 0.04    | *            |
| Blood Type B                       | -2.77       | 1.28           | 0.03    | *            |
| African American                   | 3.24        | 1.67           | 0.05    | .            |
| Caucasian                          | 1.34        | 1.03           | 0.19    |              |
| Latin                              | 0.07        | 1.14           | 0.95    |              |
| Pacific Island                     | 0.43        | 0.79           | 0.59    |              |
| Macrosomia                         | 0.40        | 1.23           | 0.74    |              |
| IUGR                               | 16.90       | 1619.38        | 0.99    |              |
| Education: High School             | -0.22       | 0.71           | 0.76    |              |
| Education: Masters                 | -0.29       | 1.69           | 0.86    |              |
| Education: Unknown                 | 0.52        | 2.43           | 0.83    |              |
| Gravida                            | 0.03        | 0.36           | 0.93    |              |
| Parity                             | -0.58       | 0.49           | 0.24    |              |

**Supplementary Table 2. Linear regression results using 27 variables and all 224 samples.**

| <b>Variable name</b>                      | <b>Coefficient</b> | <b>Standard error</b> | <b>p-value</b> | <b>Significance</b> |
|-------------------------------------------|--------------------|-----------------------|----------------|---------------------|
| <b>(Intercept)</b>                        | 6.371              | 0.654                 | <2e-16         | ***                 |
| <b>Mothers' Age</b>                       | -0.001             | 0.005                 | 0.880          |                     |
| <b>Gestational Age at Delivery (Week)</b> | -0.021             | 0.015                 | 0.149          |                     |
| <b>Membrane Ruptured</b>                  | -0.035             | 0.062                 | 0.572          |                     |
| <b>Vaginal Bleeding</b>                   | 0.116              | 0.073                 | 0.115          |                     |
| <b>Weight Gain(lbs)</b>                   | 0.000              | 0.002                 | 0.922          |                     |
| <b>Mothers' Height</b>                    | 0.007              | 0.072                 | 0.920          |                     |
| <b>Pre-pregnancy BMI</b>                  | -0.001             | 0.005                 | 0.784          |                     |
| <b>Chronic Hypertension</b>               | 0.006              | 0.087                 | 0.949          |                     |
| <b>History of Asthma</b>                  | -0.105             | 0.076                 | 0.172          |                     |
| <b>History of Anemia</b>                  | -0.016             | 0.075                 | 0.834          |                     |
| <b>Baby Sex</b>                           | -0.014             | 0.057                 | 0.804          |                     |
| <b>PE Cases</b>                           | 0.060              | 0.081                 | 0.462          |                     |
| <b>Blood Type O</b>                       | -0.105             | 0.109                 | 0.333          |                     |
| <b>Blood Type A</b>                       | 0.022              | 0.110                 | 0.844          |                     |
| <b>Blood Type B</b>                       | -0.012             | 0.117                 | 0.915          |                     |
| <b>African American</b>                   | -0.108             | 0.215                 | 0.617          |                     |
| <b>Caucasian</b>                          | -0.104             | 0.090                 | 0.251          |                     |
| <b>Latin</b>                              | 0.230              | 0.109                 | 0.036          | *                   |
| <b>Pacific Island</b>                     | 0.058              | 0.082                 | 0.482          |                     |
| <b>Macrosomia</b>                         | -0.102             | 0.124                 | 0.413          |                     |
| <b>IUGR</b>                               | 0.002              | 0.110                 | 0.989          |                     |
| <b>Education: High School</b>             | 0.007              | 0.068                 | 0.914          |                     |
| <b>Education: Masters</b>                 | -0.124             | 0.295                 | 0.675          |                     |
| <b>Education: Unknown</b>                 | -0.190             | 0.168                 | 0.259          |                     |
| <b>Gravida</b>                            | 0.016              | 0.031                 | 0.608          |                     |
| <b>Parity</b>                             | -0.055             | 0.038                 | 0.148          |                     |

**Supplementary Table 3. Linear regression result on full-term (gestational age > 38 week) samples (n=147).**

| <b>Variable name</b>                      | <b>Beta</b> | <b>Standard error</b> | <b>P-value</b> | <b>Significance</b> |
|-------------------------------------------|-------------|-----------------------|----------------|---------------------|
| <b>(Intercept)</b>                        | 7.91        | 1.66                  | 0.00           | ***                 |
| <b>Mothers' Age</b>                       | 0.00        | 0.01                  | 0.76           |                     |
| <b>Gestational Age at Delivery (Week)</b> | -0.05       | 0.04                  | 0.22           |                     |
| <b>Membrane Ruptured</b>                  | -0.03       | 0.07                  | 0.66           |                     |
| <b>Vaginal Bleeding</b>                   | 0.10        | 0.08                  | 0.23           |                     |
| <b>Weight Gain(lbs)</b>                   | 0.00        | 0.00                  | 0.74           |                     |
| <b>Mothers' Height</b>                    | -0.06       | 0.10                  | 0.56           |                     |
| <b>Pre-pregnancy BMI</b>                  | 0.00        | 0.01                  | 0.48           |                     |
| <b>Chronic Hypertension</b>               | 0.14        | 0.13                  | 0.28           |                     |
| <b>History of Asthma</b>                  | -0.21       | 0.10                  | 0.03           | *                   |
| <b>History of Anemia</b>                  | 0.11        | 0.10                  | 0.29           |                     |
| <b>Baby Sex</b>                           | 0.05        | 0.07                  | 0.48           |                     |
| <b>PE Cases</b>                           | 0.05        | 0.11                  | 0.65           |                     |
| <b>Blood Type O</b>                       | -0.19       | 0.14                  | 0.16           |                     |
| <b>Blood Type A</b>                       | -0.07       | 0.14                  | 0.60           |                     |
| <b>Blood Type B</b>                       | -0.13       | 0.15                  | 0.39           |                     |
| <b>African American</b>                   | -0.01       | 0.25                  | 0.96           |                     |
| <b>Caucasian</b>                          | 0.04        | 0.11                  | 0.74           |                     |
| <b>Latin</b>                              | 0.11        | 0.13                  | 0.40           |                     |
| <b>Pacific Island</b>                     | 0.02        | 0.10                  | 0.85           |                     |
| <b>Macrosomia</b>                         | -0.11       | 0.12                  | 0.37           |                     |
| <b>IUGR</b>                               | 0.08        | 0.43                  | 0.85           |                     |
| <b>Education: High School</b>             | 0.07        | 0.08                  | 0.38           |                     |
| <b>Education: Masters</b>                 | -0.15       | 0.29                  | 0.60           |                     |
| <b>Education: Unknown</b>                 | -0.19       | 0.30                  | 0.54           |                     |
| <b>Gravida</b>                            | -0.01       | 0.05                  | 0.91           |                     |
| <b>Parity</b>                             | -0.05       | 0.06                  | 0.45           |                     |
